# Supplementary material
Source: publisher figshare collection journal article supplement (https://tandf.figshare.com/articles/dataset/_/1246749)
Supplement: Supplementary file 1 [file 2]

Archive with 8 entries (8 files):
- kccy_a_941743_sm2322.pptx
- kccy_a_941743_sm6615.pptx
- kccy_a_941743_sm6607.pptx
- kccy_a_941743_sm6606.pptx
- kccy_a_941743_sm6599.pptx
- kccy_a_941743_sm6597.pptx
- kccy_a_941743_sm1187.doc
- kccy_a_941760_sm6256.pdf
